# Dynamic encoding of social threat and spatial context in the hypothalamus

Piotr Krzywkowski<sup>1,2</sup>, Beatrice Penna<sup>1,3</sup>, and Cornelius T. Gross<sup>1\*</sup>

<sup>1</sup> Epigenetics & Neurobiology Unit, EMBL Rome, European Molecular Biology Laboratory, Via Ramarini 32, 00015 Monterotondo (RM), Italy

<sup>2</sup> collaboration for joint PhD degree between EMBL and Heidelberg University, Faculty of Biosciences

<sup>3</sup> Masters Course in Biomedical Engineering, Faculty of Civil and Industrial Engineering, Sapienza University, Piazza Aldo Moro 5, 00185 Roma, Italy

\* To whom correspondence should be addressed: [gross@embl.it](mailto:gross@embl.it).

## Abstract

Territorial animals must be able to express social aggression or avoidance in a manner appropriate to spatial context and dominance status. Recent studies indicate that the ventromedial hypothalamus controls both innate aggression and avoidance, suggesting that it may encode an internal state of threat common to both behaviors. Here we used single unit *in vivo* calcium microendoscopy to identify neurons in the mouse ventromedial hypothalamus encoding social threat. Threat neurons were activated during social defeat as well as when the animal performed risk assessment. Unexpectedly, threat neurons were also activate in the chamber where the animal had been previously defeated and a distinct set of neurons emerged that were active in its home chamber, demonstrating the dynamic encoding of spatial context in the hypothalamus. Ensemble analysis of neural activity showed that social defeat induced a change in the encoding of social information and optogenetic activation of ventromedial hypothalamus neurons was able to elicit avoidance after, but not before social defeat, demonstrating a functional reorganization of the pathway by social experience. These findings reveal how instinctive behavior circuits in the hypothalamus dynamically encode spatial and sensory cues to drive adaptive social behaviors.

## 30 **Introduction**

31 Comparative molecular and functional studies across animal species demonstrate that the  
32 hypothalamus contains evolutionarily conserved brain networks for controlling survival  
33 behaviors and maintaining physiological homeostasis (Swanson, 2000; Tosches & Arendt,  
34 2013). Work in laboratory rodents has shown that the medial hypothalamus, in particular,  
35 harbors distinct neural systems essential for defense and reproduction (Canteras, 2002). The  
36 best understood of the medial hypothalamic nuclei is the ventromedial nucleus (VMH)  
37 whose dorsal medial (VMHdm) and ventrolateral (VMHvl) divisions are key nodes in the  
38 defensive and reproductive systems, respectively (Canteras et al., 1994; Canteras, 2002).  
39 VMHdm is required for defensive responses to predators (Silva et al., 2013; Kunwar et al.,  
40 2015; Viskaitis et al., 2017), while VMHvl is necessary for mounting and territorial  
41 aggression, key reproductive behaviors (Lin et al., 2011; Yang et al., 2013). However, loss  
42 of function studies demonstrate that defensive responses to social threats do not depend on  
43 VMHdm, but rather require VMHvl, suggesting that the reproductive system plays a more  
44 general role in controlling both aggression and defense to social stimuli (Silva et al., 2013;  
45 Silva et al., 2016). Consistent with a general role in social threat responding electrical,  
46 pharmacogenetic, or optogenetic stimulation of VMHvl is able to elicit or increase the  
47 probability of social aggression (Olivier, 1977; Kruk et al., 1983; Lin et al., 2011; Lee et al.,  
48 2014; Hashikawa et al., 2017; Yang et al., 2017; Wang et al., 2019) and avoidance (Sakurai  
49 et al., 2016; Wang et al., 2019). However, these responses are often unreliable and have  
50 been shown to be influenced by the social and hormonal status of both the subject and the  
51 threat (Lin et al., 2011; Lee et al., 2014; Sakurai et al., 2016; Yang et al., 2017) suggesting a  
52 role for past experience or other environmental factors in dictating the behavioral output of  
53 VMHvl.

54 Neurons in VMHvl show firing patterns that correlate with social investigation and attack  
55 (Lin et al., 2011; Falkner et al., 2014; Remedios et al., 2017) and cFos and bulk calcium  
56 imaging approaches identified partially overlapping recruitment of neural activity during  
57 social aggression and defeat (Motta et al., 2009; Sakurai et al., 2016; Wang et al., 2019).  
58 However, single unit recordings have not been reported during social defeat or avoidance  
59 and it remains unclear what aspects of these behaviors are encoded in VMHvl and whether  
60 the overlap between aggression and defense reflects a common behavioral or internal state  
61 component. VMHvl receives major afferents from the medial amygdala that encodes  
62 information about conspecific identity (Canteras, 1995; Swanson & Petrovich, 1998; Li et

63 al., 2017). However, VMH also receives inputs from lateral septum and subiculum that  
64 could convey contextual information (Risold & Swanson, 1997; Silva, et al., 2016; Wong et  
65 al., 2016; Lo et al., 2019) and both of these input pathways are able to modulate aggression  
66 (Wong et al., 2016; Leroy et al., 2018) suggesting that VMHvl is in a position to integrate  
67 sensory and spatial information to guide social behavior. Finally, ensemble neural activity  
68 elicited in VMHvl during social investigation can be reshaped by sexual experience,  
69 demonstrating a capacity for experience-dependent changes in VMHvl (Remedios et al.,  
70 2017).

71 Here we investigated the functional encoding of defense and aggression by VMHvl using  
72 single unit neural activity recording and optogenetic manipulation during male-male social  
73 encounters in laboratory mice. A majority of neurons in VMHvl were active in a way that  
74 was consistent with the encoding of a generalized internal state of threat, responding during  
75 a variety of social threat situations. Unexpectedly, following social defeat sets of neurons  
76 emerged that were activated by the context where the social threat had occurred or by the  
77 home cage where the animal resided, demonstrating the experience-dependent encoding of  
78 spatial context. Moreover, social defeat reshaped the neuron ensemble activity elicited  
79 during social interaction and optogenetic stimulation could elicit robust escape behavior in  
80 defeated animals, but not in undefeated controls. These findings demonstrate that VMHvl  
81 dynamically encodes social threat and spatial context states in a manner that can guide  
82 defensive behavior.

## 83 **Results**

### 84 *Encoding of social threat*

85 In order to better understand what aspects of defense are encoded in VMHvl neuron firing,  
86 we used *in vivo* microendoscopic calcium imaging to measure neuronal response properties  
87 in mice subjected to social defeat (**Figure 1a-e**). Mice were habituated to a home chamber  
88 from which they were given access to a corridor and far chamber for a brief period each day.  
89 On the social defeat day, mice were closed into the far chamber and an aggressive mouse  
90 was introduced. Following social defeat, the far chamber door was opened to allow the  
91 mouse to escape and exhibit approach-avoidance behavior toward the aggressor who  
92 remained restricted to the far chamber. Many neurons (100/246, 40%, Social+) showed an  
93 increase in activity during close social interaction that returned to baseline levels during the  
94 subsequent approach-avoidance phase (**Figure 1f-h**). Other neurons (79/246, 32%, Social-)

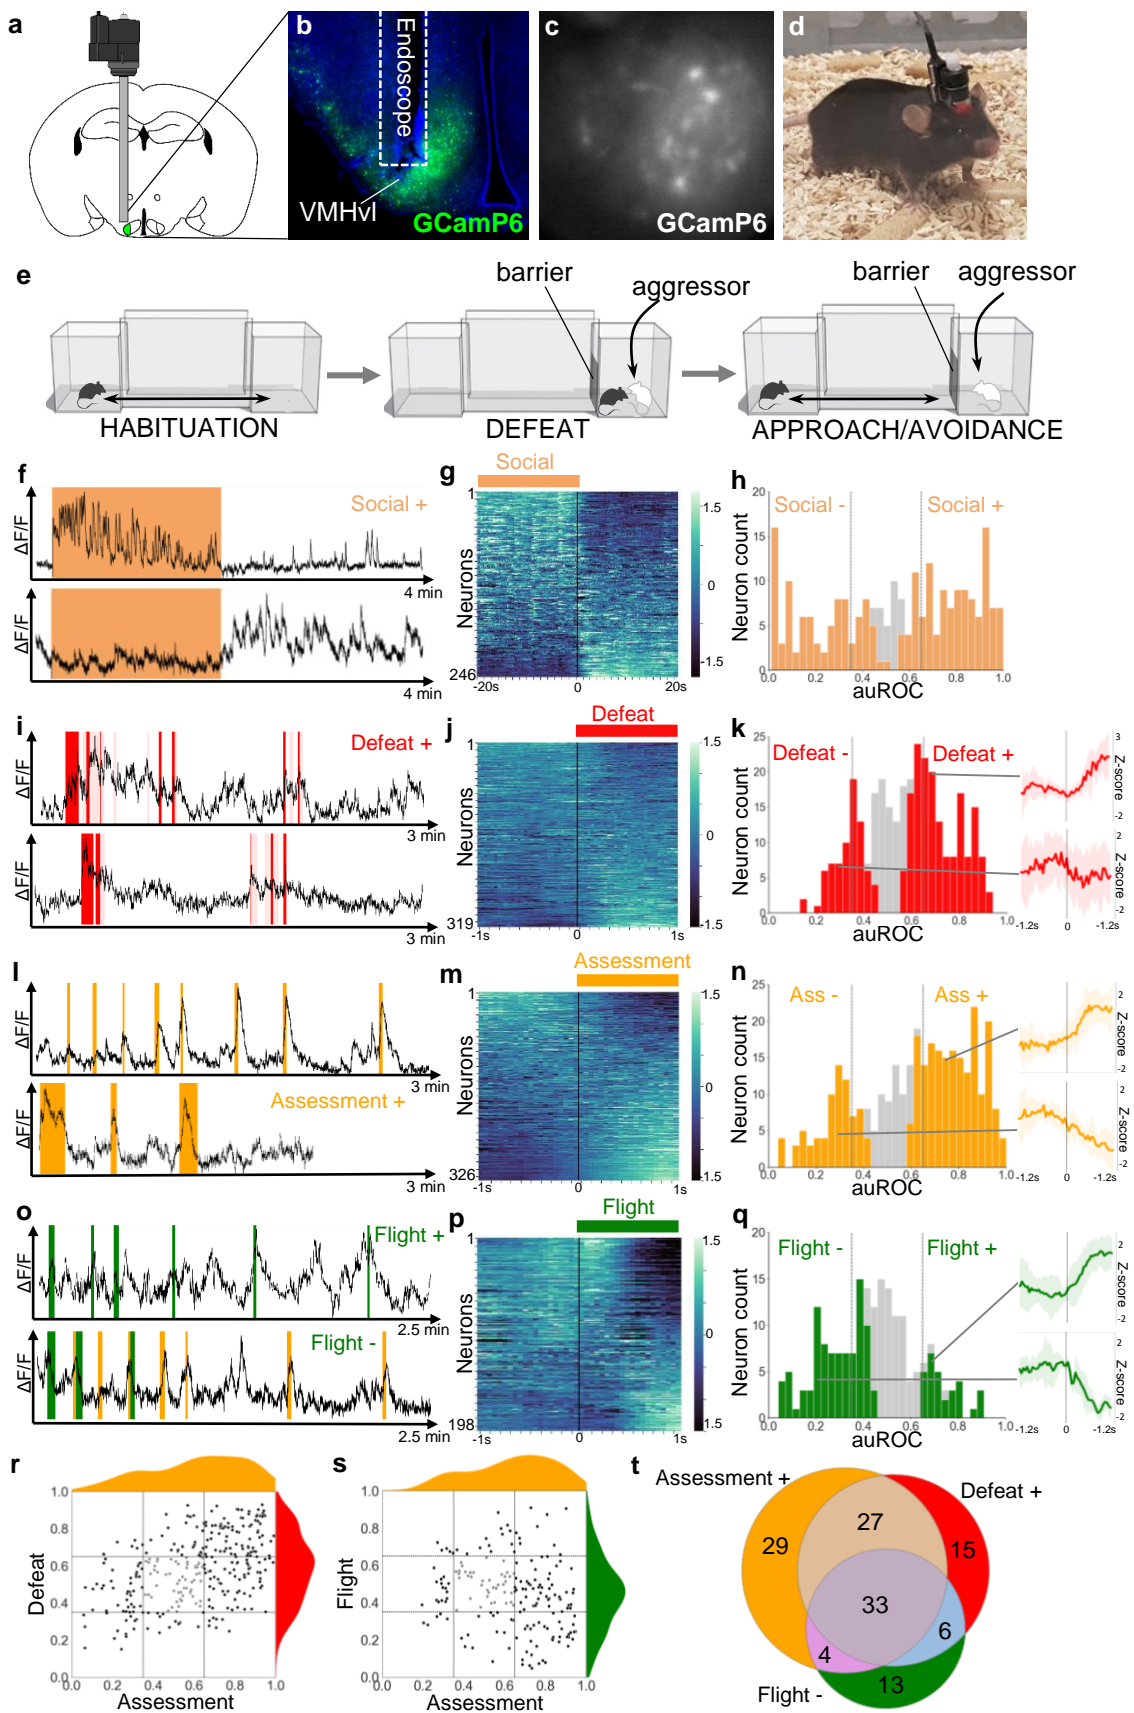

Krzywkowski et al., Figure 1

95 **Figure 1. VMHvl encodes social threat. (a-d)** Microendoscopy was used to image single  
96 unit calcium activity in VMHvl neurons of awake behaving mice expressing GCaMP6s. **(c)**  
97 Representative processed endoscope image used to extract relative changes in fluorescence  
98 ( $\Delta F/F$ ) for putative single neurons. **(e, left)** Mice were housed in a home chamber for several  
99 days during which time they were given access to a corridor and far chamber for 15 minutes  
100 each day. **(e, middle)** On the defeat day the mouse was enclosed into the far chamber and an  
101 aggressor was introduced who repeatedly attacked the mouse. **(e, right)** Subsequently, the  
102 barrier was opened and the defeated mouse exhibited approach and avoidance behavior  
103 toward the far chamber. **(f, i, l, o)** Activity traces of representative neurons showing  
104 increased (+) or decreased (-) signal during specific behaviors (color). **(g, j, m, p)** Summary  
105 of activity of all neurons across the onset or offset of each behavior. **(h, k, n, q)** Histogram  
106 of area under the receiver operator curve (auROC) for all neurons with significantly  
107 responding neurons indicated in color and average z-score  $\pm$  SD (N = 5-12) traces of  
108 representative significant positive and negative responding neurons shown at right (P <  
109 0.05). Vertical lines in histogram indicate high (0.65) and low (0.35) cut-off for scoring  
110 positively responding neurons. **(r, s)** Correlation of neuron auROC scores across behaviors.  
111 Distributions are shown outside the axes. **(t)** Overlap of Defeat+, Assessment+, and Flight-  
112 neurons (N = 4).

113 showed the opposite pattern, with unaltered or decreased activity during social investigation  
114 and increased activity during the approach-avoidance phase (**Figure 1f-h**). A smaller set of  
115 neurons showed changes in activity that were time-locked to individual defeat events  
116 (117/319, 36%, Defeat+; 36/319, 11%, Defeat-) when the intruder attacked the experimental  
117 animal (**Figure 1i-k**). These findings are consistent with earlier cFos and bulk calcium  
118 imaging studies (Motta et al., 2009; Sakurai et al., 2016; Wang et al., 2019) and confirm that  
119 VMHvl is strongly recruited during social defeat.

120 Next, we examined neural activity patterns during the post-defeat, approach-avoidance  
121 phase. The mice repeatedly advanced in a cautious manner toward the aggressor, exhibiting  
122 frequent risk assessment behaviors in which they stretched their body in the direction of the  
123 far chamber (stretch-attend or stretch-approach, Blanchard et al. 2011). Once close to the far  
124 chamber mice often turned and fled back to the home chamber (flight, **Video 1**). Calcium  
125 imaging identified many cells that were robustly activated during risk assessment either  
126 close to or far away from the far chamber (160/326, 49%, Assessment+). Smaller sets of  
127 cells were either deactivated during risk assessment (63/326, 19%, Assessment-) or activated  
128 or deactivated during flight (30/198, 15%, Flight+; 60/198, 30%, Flight-; **Figure 1l-q**).  
129 Notably, Assessment+ cells were activated during risk assessment events that occurred at a  
130 distance from the far chamber, particularly at the junction of the home cage and corridor  
131 (**Figure 1o; Video 2**). A comparison of neuronal response properties revealed that a  
132 majority of Assessment+ cells (81/152, 53% vs chance 17%,  $P < 0.001$ ) overlapped with  
133 Defeat+ cells, suggesting that they may encode a generalized internal state associated with  
134 both direct threat as well as the assessment of threat even when this does not involve close  
135 social contact (**Figure 1r**). Moreover, many Assessment+ cells (37/100, 37% vs chance  
136 14%,  $P < 0.001$ ) were also Flight- cells, showing activation as the mouse approached the far  
137 chamber and then turning off abruptly when the animal fled (**Figure 1s; Video 1**). A similar  
138 firing response pattern has been reported for neurons in VMHdm during approach toward a  
139 predator (Masferrer et al., 2018). Overall, Defeat+, Assessment+, Flight- cells showed a  
140 high degree of overlap (26% vs chance 5%,  $P < 0.001$ ) and made up the largest fraction of  
141 responsive neurons (**Figure 1t**). These findings suggest that VMHvl neurons may encode a  
142 generalized social threat state rather than particular behaviors associated with threat  
143 response.

144 ***Dynamic encoding of spatial context***

145 Our observation that a large fraction of neurons in VMHvl were activated during risk  
146 assessment both close and far from the social stimulus could be explained by the multi-  
147 sensory inputs that VMHvl receives (Canteras et al., 1995; Garfield et al., 2014; Lo et al.,  
148 2019; Wong et al., 2016). In particular, our earlier observation that VMHdm is required for  
149 the expression of defensive behaviors in a context previously associated with a predator  
150 suggested that the medial hypothalamus can be recruited by stimulus-associated cues (Silva  
151 et al., 2016) and is consistent with evidence for activation of VMHvl during nose poke in  
152 anticipation of aggression (Falkner et al., 2016). To test for the recruitment of VMHvl by  
153 purely contextual cues, we performed *in vivo* calcium endoscopy in animals who  
154 experienced social defeat and were re-exposed 24 hours later to the defeat context in the  
155 absence of the aggressor (**Figure 2a**). Analysis of neuronal response properties revealed a  
156 large fraction of neurons with robust activation in the defeat chamber (93/343, 27%, Far  
157 chamber+, **Figure 2b-d**). Unexpectedly, a second group of neurons showed marked  
158 activation in the home chamber (78/343, 23%, Home+, **Figure 2e-g**). Notably, Home+ and  
159 Far chamber+ cells abruptly turned off when the animal passed from the chamber to the  
160 corridor, suggesting that they specifically responded to the far and home chamber contexts,  
161 rather than to a gradient of social threat cues, for example. A comparison of neuronal  
162 response properties between the context, approach-avoidance, and defeat phases of the test  
163 showed that Far chamber+ neurons strongly overlapped with Social+ neurons (45/67, 67%  
164 vs chance 11%,  $P < 0.001$ ) and Home+ neurons with Social- neurons (37/60, 62% vs chance  
165 7%,  $P < 0.001$ ; **Figure 2ij**) and that Far chamber+ neurons also overlapped with Defeat+  
166 neurons (35/84, 42% vs chance 10%,  $P < 0.001$ ; **Figure 2k**) and, in a three way comparison,  
167 a larger fraction of Far chamber+ than Home+ neurons were Assessment+ or Defeat+  
168 (**Figure 2l,o**). These data suggest that VMHvl encodes a generalized state of social threat  
169 that can be reactivated by contextual cues (Social+, Defeat+, Far chamber+) as well as  
170 features of social territory (Home+).

171 To understand whether the recruitment by context was linked to the past experience of the  
172 animal we compared context encoding in animals before and after social defeat. Only a  
173 small number of Far chamber+ and Home+ cells could be identified during the pre-defeat  
174 habituation phase even though the animal explored the apparatus to a similar extent in both  
175 phases (**Figure S3**). To quantify changes in neuron activity before and after defeat we  
176 employed linear discriminant analysis (LDA) of neuron ensemble activity. Before defeat,

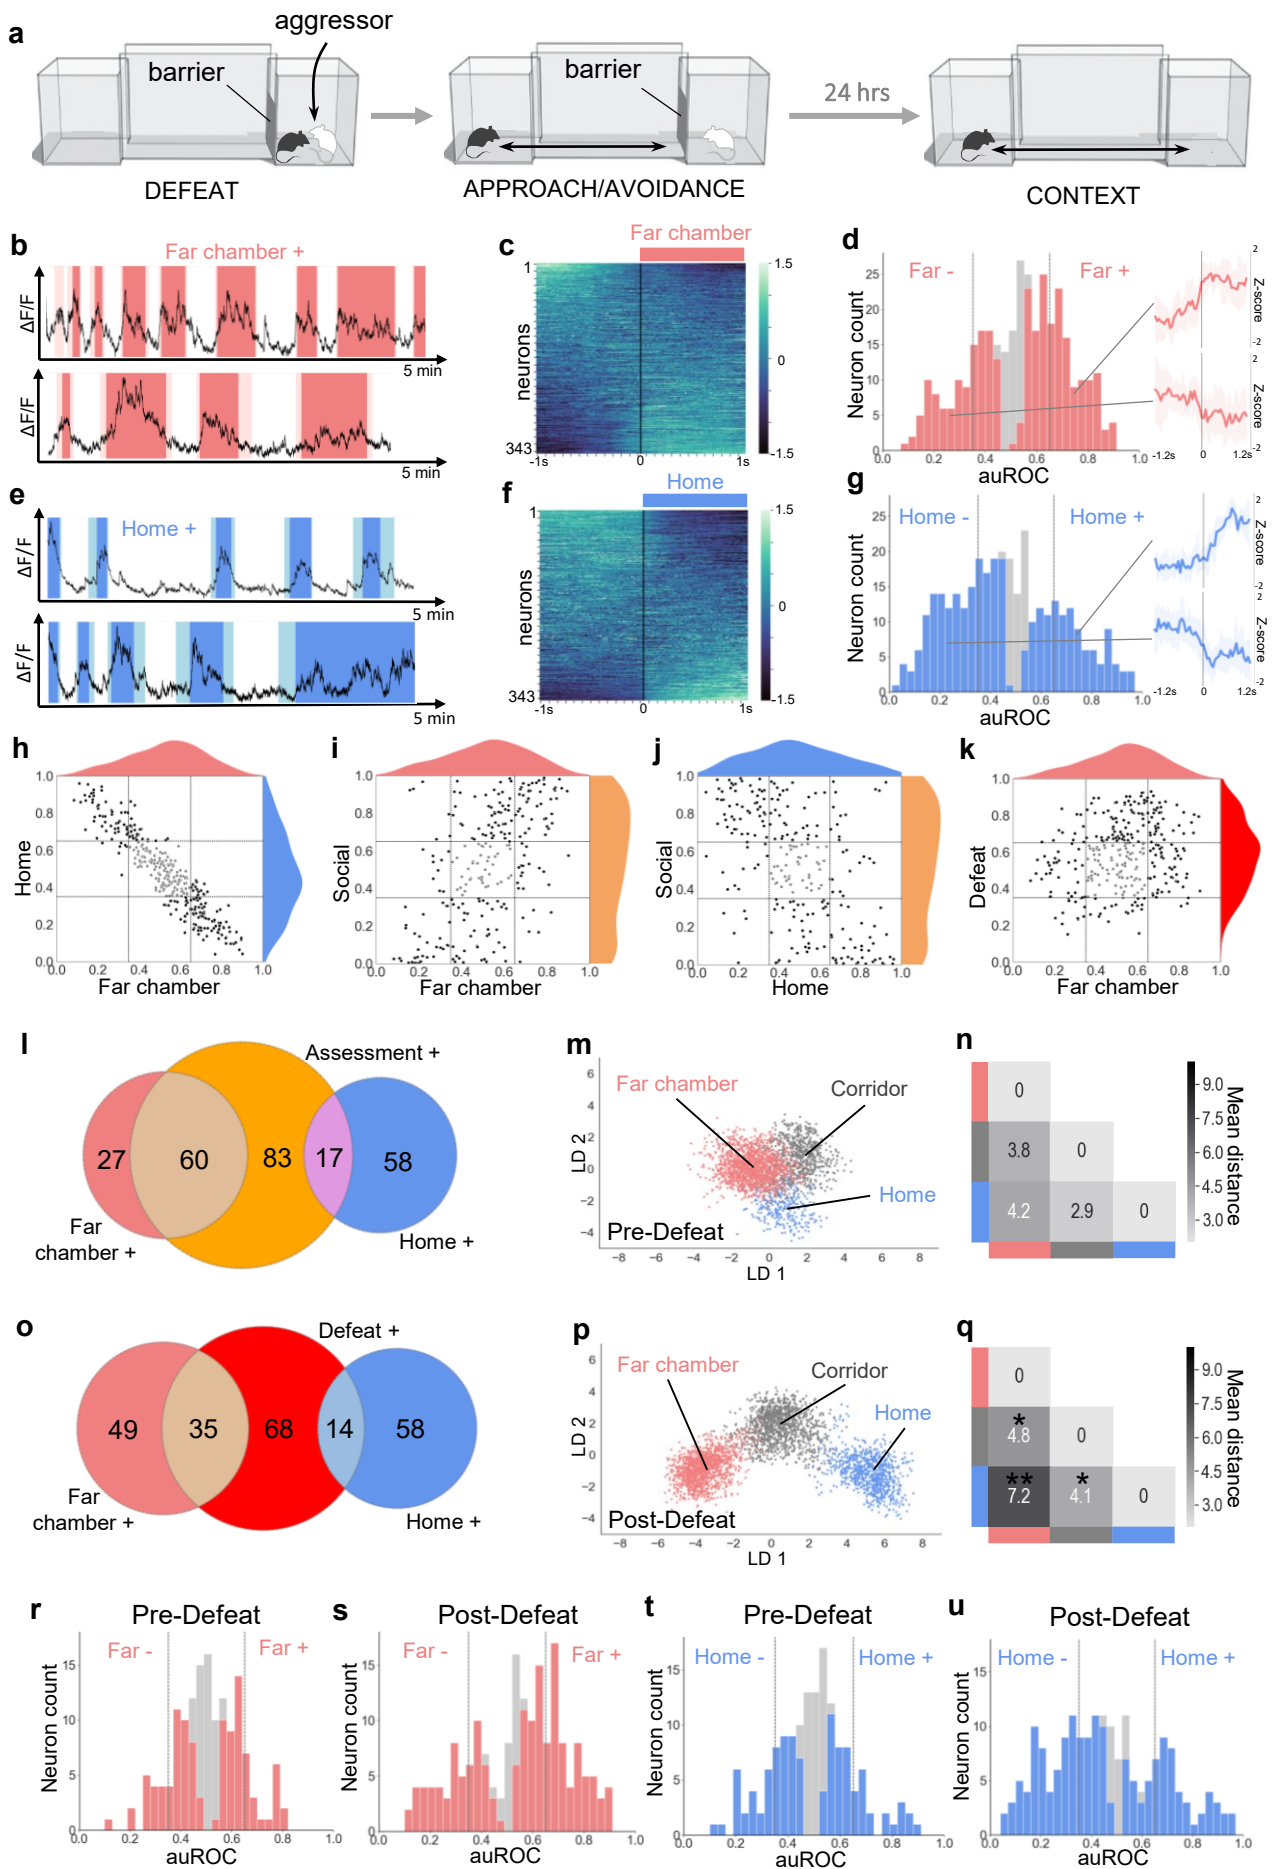

Krzywkowski et al., Figure 2



177 **Figure 2. Dynamic encoding of spatial context in VMHvl.** (a) *In vivo* calcium endoscopy  
178 was carried out in mice subjected to (left, middle) social defeat and then exposed again to  
179 (right) the defeat context one day later. (b, e) Activity traces of representative neurons  
180 showing increased (+) signal when the mouse enters the far or home chamber (dark color) or  
181 its immediately adjacent corridor (light color). (c, f) Summary of activity of all neurons across  
182 the transition into the far or home chamber. (d, g) Histogram of area under the receiver  
183 operator curve for all neurons with significantly responding neurons indicated in color and  
184 average z-score traces  $\pm$  SD (N = 9-10) of representative significant positive and negative  
185 responding neurons shown at right (P < 0.05). Vertical lines in histogram indicate high (0.65)  
186 and low (0.35) cut-off for scoring positively responding neurons. (h-k) Correlation of neuron  
187 auROC scores between chambers and/or behavior. Distributions are shown outside the axes.  
188 (l, o) Overlap of Far chamber+, Home+, Assessment+, and Defeat+ neurons (N = 7). (m, p)  
189 LDA plot of neuron ensemble activity for a representative mouse in the home, far chamber, or  
190 corridor. Each data point represents a frame of calcium imaging data projected onto the first  
191 two linear discriminants. (n, q) Average distances between clusters of frames representing  
192 neuron ensemble activity for all mice (\*P < 0.05, \*\*P < 0.01). (r-u) Histograms of area under  
193 the receiver operator curve for all neurons with significantly responding neurons indicated in  
194 color. Vertical lines indicate high (0.65) and low (0.35) cut-off for scoring positively  
195 responding neurons. (m, n, r, t) Habituation phase before social defeat, and (p, q, s, u)  
196 context phase after social defeat (N = 4).

197 neuron ensemble activity in the home, corridor, and far chambers was overlapping as  
198 visualized using principal LDA discriminants (**Figure 2mn** and **Figure S1**). Following  
199 defeat, however, home, corridor, and far chamber ensemble activity became significantly  
200 more separated (**Figure 2pq** and **Figure S2** Home vs. Far chamber LDA distance,  $P < 0.01$ )  
201 confirming the observation that social defeat induced a marked enhancement of the encoding  
202 of spatial context and suggesting that VMHvl may dynamically encode features of territory.

### 203 *Overlapping encoding of aggression and defense*

204 Having established that VMHvl encodes features of social threat and context we examined  
205 the hypothesis that social threat neurons would also be active during aggression. First, we  
206 performed serial cFos labeling using TRAP-tagging (*cFos::CreERT2*; *Rosa26::LSL-tomato*;  
207 Guenther et al., 2013) to determine the extent of overlap in recruitment during social defeat  
208 and resident-intruder aggression. Naïve animals were subjected to two resident-intruder tests  
209 at one week interval in which they were either the resident or intruder, in all possible  
210 combinations (Aggression-Aggression, Defense-Defense, Aggression-Defense, Defense-  
211 Aggression). Immediately following the first test mice were treated with 4-OHT to induce  
212 persistent labeling of cFos+ cells, followed by immunolabeling of cFos+ cells after the  
213 second test. Animals subjected to the same behavioral experience (Aggression-Aggression  
214 or Defense-Defense) showed  $50 \pm 15\%$  overlap of cFos+ cells while those with different  
215 experiences (Aggression-Defense or Defense-Aggression) showed  $18 \pm 5\%$  overlap and those  
216 under control conditions  $10 \pm 2\%$  overlap (ANOVA:  $F = 20.89$ ,  $P = 0.0001$ ; **Figure 3a-d**).  
217 These data are consistent with experiments using a viral cFos-tagging strategy (Sakurai et  
218 al., 2016) and suggest that approximately one quarter of the cells in VMHvl activated during  
219 aggression and defense are recruited by both experiences and that this population of cells  
220 may support a common function during male-male social interaction.

221 Next, we used *in vivo* calcium endoscopy to understand whether VMHvl neurons recruited  
222 during aggression might overlap with the social threat and context neurons identified  
223 following defeat. Robust aggression was elicited by confining the mouse to its home cage  
224 and introducing a subordinate male mouse. During aggression phasic modulation of neuron  
225 activity occurred during bouts in which the resident actively investigated (56/310, 18%  
226 Sniff+; **Figure 3e-g**) or attacked (38/266, 14% Attack+; **Figure 3h-j**) the intruder.  
227 Comparison of neuronal response properties revealed that most Attack+ neurons (19/37,  
228 51% vs chance 3%,  $P < 0.001$ ) were Sniff+ neurons (**Figure 3k**), consistent with a strong

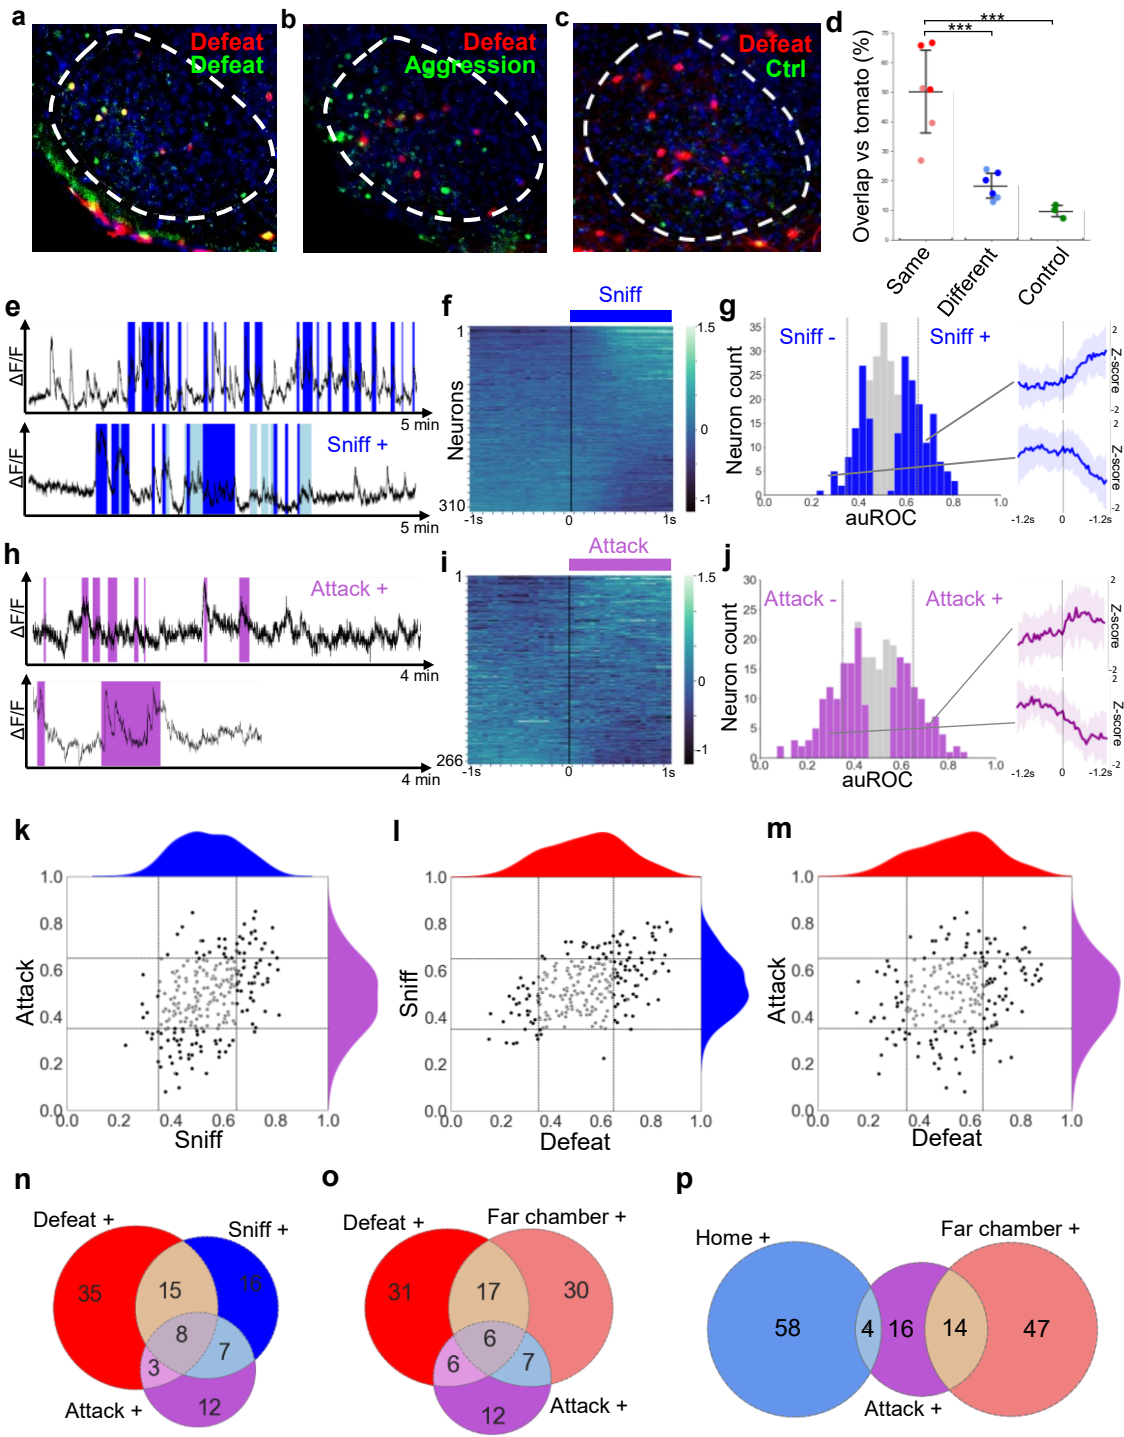

229 **Figure 3. Overlapping encoding of social defense and aggression.** (a-c) Representative  
230 images of cFos-tagged (red) and cFos-immunolabeled (green), and double labelled (yellow)  
231 cells in brain sections from mice subjected sequentially to social defeat and aggression in a  
232 counterbalanced manner. (d) Average percentage overlap of defeat and aggression recruited  
233 cFos+ cells as revealed by the difference between cFos+ overlap for same, different, or  
234 control behaviors (dark red: Defeat-Defeat, dark blue: Defeat-Aggression, green: Defeat-  
235 Control; light red: Aggression-Aggression, light blue: Aggression-Defeat; Same vs.  
236 Different,  $P < 0.001$   $N = 6$ ; Same vs. Control,  $P < 0.001$ ,  $N = 3-6$ ; Different vs. Control,  $P >$   
237  $0.05$ ,  $N = 3-6$ ; bars represent SD). (e, h) Activity traces of representative neurons showing  
238 increased (+) signal during close social investigation (Sniff+, dark blue; ano-genital sniffing,  
239 light blue) and aggression (Attack+). (f, i) Summary of activity of all neurons across the  
240 onset of behavior. (g, j) Histogram of area under the receiver operator curve for all neurons  
241 with significantly responding neurons indicated in color and average z-score traces  $\pm$  SD ( $N$   
242  $= 22-34$ ) of representative significant positive and negative responding neurons shown at  
243 right ( $P < 0.05$ ). Vertical lines in histogram indicate high (0.65) and low (0.35) cut-off for  
244 scoring positively responding neurons. (k-m) Correlation of neuron auROC scores among  
245 aggression behaviors and between aggression and defense behaviors. Distributions are  
246 shown outside the axes. (n-p) Overlap of aggression, defense, and territory-related neurons  
247 ( $N = 5$ ).

248 overlap between these populations in previous single unit recording studies (Lin et al., 2011;  
249 Falkner et al., 2014). Comparison of neuronal response properties across social defeat and  
250 aggression showed that a large fraction of Defeat+ neurons (24/68, 35% vs chance 6%,  
251  $P < 0.001$ ) were reactivated during active investigation of the subordinate (Sniff+), indicating  
252 that these may encode a common social threat state in both defenders and attackers (**Figure**  
253 **3l**). A smaller fraction of Defeat+ neurons (12/60, 20% vs chance 5%,  $P < 0.05$ ) were Attack+  
254 neurons (**Figure 3m**) and a three way comparison revealed that 42% of Defeat+ cells  
255 overlap with either Sniff+ or Attack+ (**Figure 3n**), a finding that is consistent with our cFos  
256 data (**Figure 3a-d**) and confirms the recruitment of both common and unique neuron  
257 ensembles during defense and aggression. Comparison of aggression responsive neurons  
258 with those activated by the defeat context (Far chamber+) revealed an overlap between  
259 Attack+, Defeat+, and Far chamber+ neurons (**Figure 3o**). Unexpectedly, Attack+ neurons  
260 showed more overlap with Far chamber+ (14/34, 41% vs chance 4%,  $P < 0.001$ ) than Home+  
261 neurons (4/34, 12% vs chance 3%,  $P = 0.356$ ; **Figure 3p**) despite the fact that the attack  
262 occurred in the home cage, reinforcing the idea that aggression elicits features of social  
263 threat, rather than safety.

#### 264 *Social defeat remodels neural activity and function*

265 Following on our observation that social defeat elicited changes in contextual encoding in  
266 VMHvl (**Figure 2**) and previous experiments showing that sexual experience can remodel  
267 VMHvl ensemble activity elicited by exposure to a social stimulus (Remedios et al., 2017)  
268 we investigated the possibility that social defeat might also induce changes in neural activity  
269 elicited during social encounter. Animals were exposed to repeated social defeat experiences  
270 in the far chamber of a dual chamber apparatus as described earlier (**Figure 1e**). The  
271 experimental animals showed similar frequencies of behaviors across the two days of social  
272 defeat (**Figure S4**). Nevertheless, we restricted our ensemble analysis to data extracted from  
273 bouts of close social encounter (defeat, upright, orientating, sniffing, following, see  
274 **Materials & Methods**), so as to minimize any confounding effect of potential changes in  
275 behavior across experimental sessions. Linear discriminant analysis (LDA) was used to  
276 track and quantify shifts in neuron ensemble encoding across sessions. Neuron ensemble  
277 activity elicited during the first and second social defeat experiences were significantly non-  
278 overlapping (**Figure 4ab** and **Figure S6**). As a control, we used LDA to track and quantify  
279 neuron ensemble activity across sessions of resident-intruder aggression carried out as  
280 previously described (**Figure S5**). Unlike social defeat and consistent with previous studies

281 (Remedios et al., 2017) repeated aggression was not associated with changes in neuron  
282 ensemble activity (**Figure 4ab** and **Figure S6**) demonstrating that defeat has a unique  
283 capacity to alter the encoding of social cues in VMHvl. Notably, this change was found only  
284 when defeats preceded, but not when they followed aggression experiences (**Figure S7**).  
285 This finding demonstrates that changes in neuron ensemble encoding seen across days are  
286 likely due to experience-dependent plasticity rather than spontaneous fluctuations in firing  
287 patterns, and suggests that repeated exposure to aggression and winning may impart  
288 resistance to the transforming effects of social defeat on social encoding in VMHvl.

289 Changes in neuron ensemble encoding in VMHvl following social defeat could reflect  
290 plasticity in upstream brain regions that provide afferent inputs to VMHvl or they could be  
291 due to plasticity within VMHvl. To distinguish these possibilities we used a gain-of-function  
292 approach. Previous work showed that optogenetic activation of estrogen receptor  $\alpha$   
293 expressing (Esr1+) neurons in VMHvl can elicit aggression against females or castrated  
294 males (Lee et al., 2014; Wang et al., 2019). Notably, however, in some cases such animals  
295 showed brief avoidance responses during the initial stimulation trials (Lee et al., 2014)  
296 suggesting that VMHvl Esr1+ neurons are capable of promoting both aggression and  
297 avoidance, possibly in a way that depends on context, dominance status, or social  
298 experience. To test whether social defeat might induce changes in VMHvl Esr1+ function  
299 we expressed the blue light-activated cationic channel, channelrhodopsin 2 (ChR2), in Esr1+  
300 VMHvl neurons (AAV-*Efl*  $\alpha$ ::FLEX-ChR2, *Esr1*::Cre mice) and subjected the animals to  
301 two sessions of social defeat (**Figure 4c-e**).

302 Several hours after social defeat a subordinate intruder mouse was introduced into the home  
303 cage of the animal and following a period of habituation, light pulses were delivered to  
304 activate Esr1+ neurons. Following social defeat optogenetic activation of Esr1+ neurons  
305 elicited rapid and robust defensive behaviors, including freezing, flight, a reduction in social  
306 interaction, and immobility in all animals (**Figure 4f**). In one particularly striking case,  
307 optogenetic activation of Esr1+ neurons occurring while the resident was attacking the  
308 intruder caused an abrupt cessation of aggression and evoked sudden flights away from the  
309 subordinate animal (**Video 3**). Notably, no significant increase in defensive behavior was  
310 elicited by optogenetic activation in ChR2-expressing mice that were stimulated during a  
311 resident-intruder test on the day before the social defeat (**Figure 4g**), nor in mice expressing  
312 a control virus (AAV-*Efl*  $\alpha$ ::FLEX-YFP, *Esr1*::Cre). These data demonstrate that VMHvl

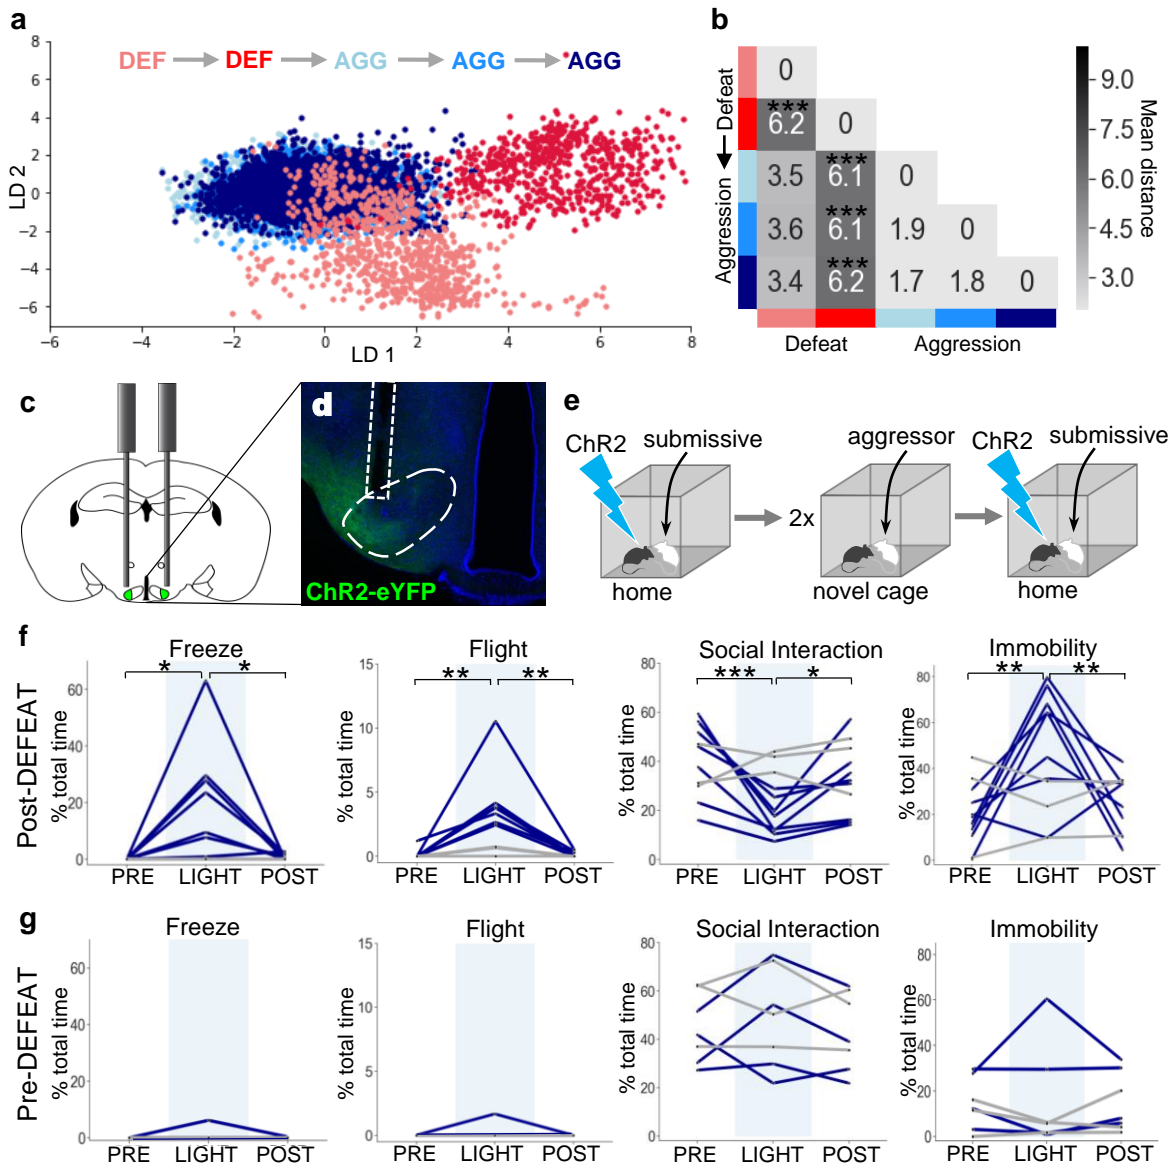

313 **Figure 4. Social defeat remodels VMHvl activity and function. (a)** LDA plot of neuron  
314 ensemble activity for a representative mouse during repeated defeat and aggression episodes.  
315 Each data point represents a frame of calcium imaging data projected onto the first two  
316 linear discriminants. **(b)** Average distances between clusters of neuron ensemble data  
317 between defeat and aggression episodes for all mice during forward order testing (N = 4;  
318 colors refer to episodes in **a**; \*P < 0.05, \*\*P < 0.01, \*\*\*P < 0.001) colors refer to episodes  
319 in **a**). **(c-d)** Optogenetic stimulation of *Esr1*<sup>+</sup> neurons following local delivery of AAV-  
320 *Efla*::FLEX-ChR2-eYFP into the VMHvl of *Esr1*::Cre mice. **(e)** Mice were stimulated  
321 intermittently (20 Hz, 20 ms pulse, 30 s ON) following the introduction of a subordinate  
322 mouse into the home cage before (Pre-Defeat) and/or after (Post-Defeat) two episodes of  
323 social defeat in the far chamber. **(f-g)** Trial-averaged (N = 4-5 trials) behavioral measures  
324 before (Pre, 30 s), during (Light, 30 s), and after (Post, 30 s) optogenetic stimulation of  
325 *Esr1*<sup>+</sup> neurons in VMHvl during either the **(f)** Post-Defeat or **(g)** Pre-Defeat episodes (N =  
326 3-7, \*P < 0.05, \*\*P < 0.01, \*\*\*P < 0.001).



327 neurons promote aggression and defense in a manner that depends on social experience and  
328 argue that at least part of the plasticity in neuron ensemble recruitment during social  
329 interaction (**Figure 4ab**) occurs within or downstream of VMHvl.

## 330 **Discussion**

331 By performing single unit *in vivo* recordings during social defeat as well as during the post-  
332 defeat approach-avoidance period, again during re-exposure to the threat context one day  
333 later, and during resident-intruder aggression we were able to examine the encoding of  
334 social threat in the VMHvl across a wide variety of defensive behaviors. Neurons activated  
335 when the animal was attacked were reactivated later when the animal performed risk  
336 assessment behaviors (**Figure 1l,o; Video 2**) and many of them were reactivated when the  
337 animal explored the chamber where the defeat occurred one day later (**Figure 2l,o**).  
338 Moreover, a significant fraction of social threat cells were activated when the same mouse  
339 sniffed or attacked a subordinate mouse in its home cage (resident-intruder test, **Figure 3n**)  
340 consistent with the view that conspecific aggression in mice is driven by a defensive instinct  
341 aimed at expelling competitors from their territory and ensuring access to reproductive and  
342 nutritional resources (Lorenz, 1963) Nevertheless, overall, neurons were more robustly  
343 activated when the animal was being attacked than when they were attacking, suggesting a  
344 more efficient recruitment of VMHvl by threat in the losing animal (**Figure 1i-n** and **Figure**  
345 **3h-j, n**). These data allow us to conclude that a major function of VMHvl is to provide an  
346 internal state of social threat that can be generalized across a wide variety of defensive  
347 behaviors and cues.

348 Our observation that social defeat drove the rapid emergence of a unique set of cells that  
349 fired in the home chamber and did not overlap with those encoding social threat (**Figure 2h-**  
350 **i, o-q**) was unexpected and shows that VMHvl encodes aspects of spatial context beyond  
351 those associated with threat. Although the function of these home cells is presently  
352 unknown, we speculate that they encode aspects of the animal's territory and that they may  
353 function to support territorial behaviors such as scent marking, sex, and defensive  
354 aggression. We noted that Home+ and Far chamber+ cells were modulated abruptly when  
355 the animal entered or exited the relevant chamber, suggesting that they encode context rather  
356 than a gradient of threat (**Figure 2b,e**). VMHvl receives inputs from the ventral  
357 hippocampus via LS that could contribute territory-related contextual information (Risold et  
358 al., 1997; Strange et al., 2014) and are able to modulate conspecific aggression in VMHvl

359 (Leroy et al., 2018; Wong et al., 2016). Our findings open up the possibility that contextual  
360 and social cues are integrated in a dynamic manner in VMHvl to drive and modulate a wide  
361 variety of behaviors aimed at territorial defense.

362 Our neuron ensemble analysis shows that social defeat reshaped both spatial context as well  
363 as social cue encoding. Ensemble neuron activity elicited during close social investigation  
364 became transformed following a social defeat experience, but not following a social  
365 aggression experience (**Figure 4a-b**). The latter observation is consistent with a previous  
366 recording study in which resident-intruder aggression failed to induce changes in VMHvl  
367 ensemble activity, while sex did (Remedios et al., 2017). Finally, our gain-of-function  
368 experiment demonstrates that the social defeat-induced transformation of encoding involves  
369 functional plasticity in or downstream of VMHvl *Esr1+* neurons (**Figure 4c-g**). We note that  
370 in our hands optogenetic stimulation of VMHvl *Esr1+* neurons was unable to elicit reliable  
371 aggression behavior against intact male intruders under baseline conditions, a finding that is  
372 consistent with previous studies where such stimulation only elicited reliably aggression  
373 against females or castrated males and in which a significant fraction of animals showed  
374 brief avoidance behavior upon initial optogenetic stimulation (Lee et al., 2014; Lin et al.,  
375 2011). We interpret these findings to indicate that VMHvl is primed to promote either  
376 defensive avoidance or defensive aggression under baseline conditions in a manner that  
377 depends on past social experience. This interpretation is supported by a study showing that  
378 pharmacogenetic activation of progesterone receptor expressing neurons in VMHvl can  
379 increase the reliability of attack in the resident-intruder assay if the animal was previously  
380 singly housed, but not if it was group housed (Yang et al., 2017).

381 Our observations reveal the encoding and control of instinctive motivational states by  
382 VMHvl neurons, showing that these encode an experience-dependent map of spatial context  
383 and that they exhibit functional plasticity in response to past social experience that guides  
384 the selection of instinctive behavioral outputs. These data argue for a reevaluation of the role  
385 of the hypothalamus in behavior. Rather than being viewed as a hardwired, innate behavioral  
386 response region, it should be seen as an integrator of present and past sensory and contextual  
387 information that adapts survival behaviors to a changing environment.

## 388 **Materials & Methods**

### 389 *Animals and behavioral apparatus*

390 All experimental procedures involving the use of animals were carried out in accordance  
391 with EU Directive 2010/63/EU and under approval of the EMBL Animal Use Committee  
392 and Italian Ministry of Health License 541/2015-PR to C.G. Animals were maintained in a  
393 temperature and humidity controlled environment with food and water provided *ad libitum*  
394 and 12h/12h light-dark cycle with lights on at 7:00. Experimental male C57BL/6J wild type  
395 (Charles River) and *Esr1::Cre* (Stock No. 017913, Jackson Laboratory) mice were switched  
396 to reverse dark-light cycle (lights off at 9:00) and singly housed in the home cage of the  
397 behavioral apparatus at least one week before initiating the experimental procedures and  
398 tested during the dark period under red lighting (two 1W LED lights). The custom Plexiglas  
399 behavioral apparatus consisted of three detachable parts: 1) home cage with dimensions  
400 25x25x25 cm with a Y-shaped slit, 4 cm wide at the bottom serving as an entrance closed by  
401 sliding doors, 2) stimulus chamber identical to home cage, and 3) a corridor 46x12x30 cm  
402 connecting home cage and stimulus chamber (modified from Silva et al., 2013). Aggressor  
403 mice were CD-1 adult retired breeders (Charles River) screened for robust aggression and  
404 singly housed (Franklin et al., 2017). Subordinate mice were 9-15 week old BALB/c males  
405 bred at EMBL. Mice cages were changed weekly.

### 406 *Surgical procedures*

407 Mice were anesthetised before surgery with 3% isoflurane (Provet) in oxygen and placed in  
408 stereotaxic frame (Kopf). Anaesthesia was maintained with continuous 1-2% isoflurane  
409 administration in breathing air enriched with oxygen. Body temperature was maintained  
410 with a heating pad. During surgery the skull was exposed, aligned, and cleaned with 0.3%  
411 hydrogen peroxide solution. For optogenetic activation experiments 0.1-0.2  $\mu$ l of AAV5-  
412 *Efla::DIO-hChR2(E123T/T159C)-EYFP* or AAV5-*Efla::DIO-EYFP* virus (UNC Vector  
413 Core) was infused bilaterally into VMHv1 (from Bregma L: +/-0.67, A/P: -0.98, D/V: -5,75).  
414 After 5-10 min the glass capillary was retracted and custom-made optic fibre connectors  
415 were implanted (0.66 NA, 200  $\mu$ m core fibre and ceramic ferule with 230  $\mu$ m /1250  $\mu$ m  
416 internal/external diameter; from Bregma L: +/-0.67, A/P: -0.98, D/V: -5.55 and L: +/-1.14,  
417 A/P: -0.98, D/V: -5.6, at 5° angle). For *in vivo* calcium endoscopy 0.2-0.3  $\mu$ l of AAV5-  
418 *hSyn::GCaMP6s* (Penn Vector Core) virus was injected unilaterally into VMHv1 and the  
419 endoscope lens (Snap-imaging cannula model L type E, Doric Lenses) was implanted at a

420 very slow rate (from Bregma L: +/-0.67, A/P: -0.98, D/V: -5.7). All implants were secured  
421 to the skull using miniature screws (RWD) and dental cement (Duralay). The wound was  
422 cleaned and skin was stitched around the implant. After the surgery mice received intra-  
423 peritoneal injection of 0.4 ml saline and were placed into heated cages with drinking water  
424 containing paracetamol for ~1 week. Mice were maintained in isolation for ~4 weeks before  
425 experimentation.

#### 426 ***Social defeat test***

427 On the social defeat day, the mouse was allowed to explore the apparatus freely for 5  
428 minutes, after which the animal was closed in the stimulus chamber and an aggressor was  
429 introduced for 10 minutes. In a few cases the animal was allowed to escape earlier to avoid  
430 excessive defeat. The mouse was released from the stimulus chamber and the door closed to  
431 confine the aggressor to the stimulus chamber. After social defeat the mouse was allowed to  
432 explore the apparatus freely for at least 5 minutes. The memory test was conducted on the  
433 day following after social defeat, during which the mouse could explore the apparatus freely.  
434 The apparatus was washed with detergent and 50% alcohol between mice to avoid any  
435 remaining smell that could influence behavior of the test subject. CD-1 aggressors were  
436 screened for aggression for 3 days. Every day an intruder was placed in the aggressor's cage  
437 for 3 minutes. Only mice that attacked the intruder on every occasion were selected.

#### 438 ***Aggression test***

439 On the aggression day a BALB/c intruder was introduced for 10 min after which the intruder  
440 was removed. BALB/c intruders used for this test were 9-15 weeks old and housed 3-5 mice  
441 per cage. For cFos experiments animal were allowed to explore the entire apparatus for 5  
442 min before and after introduction of the intruder in order to match exploration in the social  
443 defeat test.

#### 444 ***Behavioral data acquisition and annotation***

445 Behavior was recorded at 40-50 Hz from above with up to two cameras (acA1300-  
446 60gmHIR, Basler) with GigE connections using Pylon software. Frame-by-frame behavioral  
447 annotation was carried out manually using Observer XT11 (Noldus) and Solomon Coder  
448 software. The experimenter was blind to genotype or calcium trace of recorded neurons  
449 when scoring behavior. The following behaviors were scored: defeat – biting attack toward  
450 the experimental animal in which the animal exhibited avoidance behavior (whole body

451 movement away from intruder); *assessment* – stretch attend or stretch approach behavior in  
452 which the animal extended its body in the direction of the threat or threat chamber from an  
453 immobile or slowly moving position; *flight* – rapid movement away from the threat or threat  
454 chamber; *attack* – biting attack or vigorous anogenital sniffing toward the intruder animal;  
455 *sniffing* – close contact of the nose of the experimental animal with the intruder; *upright* –  
456 animal rises on back paws with head up, keeping front paws stretch out ; *put down* –  
457 keeping other animal down usually with two front paws and staying on top of it; *follow* –  
458 experimental animal closely follows intruder; *cornering* – staying in the corner of the  
459 apparatus (animal has body contact with two walls); *locomotion* – free movement and  
460 exploration of experimental apparatus; *freeze* – no body movement ; *head/body orientation*  
461 – turning head or whole body towards another conspecific. Any animals with misplaced  
462 viral infections or optic fiber implants were excluded from the analysis.

### 463 ***Histology***

464 All animals were deeply anesthetized and transcardially perfused with PBS (Invitrogen)  
465 followed by 4% PFA (Sigma) in 0.1M PB solution and then post-fixed in 4% PFA at 4°C for  
466 24h and cut using a vibratome (Leica VT 1000s) in PBS (80µm) for injection or implant  
467 location check, or staining (50 µm) procedure. If not used immediately, sections were stored  
468 in PBS with 0.1% sodium azide. For anti-cFos staining (SC-52G, Lot FO215, Santa Cruz)  
469 sections were washed three times in PBS for 10 min, blocked with 10% normal donkey  
470 serum, 0.2% Triton-X in PBS for at least 1h, and incubated with primary antibody (1:500)  
471 containing 5% normal donkey serum, 0.2% Triton-X overnight at 4°C. Sections were  
472 washed three times in PBS, incubated with secondary antibody solution (1:1000) containing  
473 10% normal donkey serum for 2h at room temperature, washed twice with PBS, and stained  
474 with DAPI for 15 min, before washing twice with PBS and mounting on SuperFrost Plus  
475 slides (ThermoFischer) with Moviol.

### 476 ***cFos mapping***

477 Double heterozygous *cFos::CreERT2;RC::LSL-tdTomato* mice (Stock No. 021882 and  
478 007914, Jackson Laboratory) were isolated for 7 days and subjected to 3 days of habituation  
479 to the apparatus before social defeat. A single dose (50mg/kg) of 4-hydroxytamoxifen (4-  
480 OHT, 70% z-isomer, Sigma) was injected intra-peritoneally <2 min after social defeat to  
481 induce fluorophore expression in neurons recruited by defeat. One week later, mice were  
482 again habituated for 3 days to the apparatus and subjected to social aggression, and 1.5h

483 later trans-cardially perfused and processed for cFos immunofluorescence. In a second  
484 group the order of social defeat and social aggression were swapped to produce five  
485 experimental groups: defense-defense (same), aggression-aggression (same), defense-  
486 aggression (different), aggression-defense (different), defense-control (control). Control  
487 indicates mice exposed only to context prior to labelling.

### 488 *Optogenetic experiments*

489 Heterozygous *Esr1::Cre* mice were injected with virus and allowed to recover for 2-3 weeks,  
490 housed under reverse light-cycle for 2 weeks, and then handled and habituated to the optical  
491 cables for at least 2 days prior to testing. Initially, after a 2 min free exploration period, each  
492 animal was stimulated with light (30 s, 20 Hz) every 1-2 min with increasing power (0.5, 1,  
493 3, 6, 10 mW) to identify the optimal intensity to elicit a behavioral response (immobility or  
494 locomotion) and this was subsequently used for further stimulation. Control animals  
495 received 6 mW stimulation. For stimulation in the presence of a subordinate intruder free  
496 exploration was allowed for ~3 min during which a single light stimulus was delivered (30s,  
497 20Hz) after which a BALB/c intruder was introduced and the animal was further stimulated  
498 (3-5 times, 30s, 20Hz) during periods of social interaction. Mice were then subjected to two  
499 days of social defeat (5 min) by a CD-1 intruder in a novel plexiglas cage following 1 min  
500 free exploration. Several hours later, stimulation in the presence of a subordinate intruder  
501 was repeated as above. Optical stimulation of Chr2 was achieved using a 465 nm LED  
502 (Plexbright, Plexon) attached to a manual rotatory joint with 1m patch cables (Plexbright  
503 High Performance, Plexon). Power at the end of the patch cables was measured before each  
504 experiment with a portable optical power meter (Thor Labs) and stimulation trains were  
505 generated using V2.2 Radiant software (Plexon). Animals with mistargeted viral injections  
506 or optic fibers were excluded from the analysis.

### 507 *Calcium endoscopy*

508 Following GCaMP6 virus infection, GRIN lens imaging canulae (Model L, Doric Lenses)  
509 were stereotaxically implanted over the VMHvl and mice allowed to recover for 2-3 weeks  
510 followed by 2 weeks isolation under reverse light-cycle and at least 3 days habituation to the  
511 microscope plugging and unplugging procedure. Mice were then habituated to the  
512 behavioral apparatus for three days, and for the second and third days the microscope body  
513 was attached. The following week mice (N = 4) were subjected to two consecutive social  
514 defeats tests (day 1: social defeat, day 2: memory) over four days, and 2-3 days later, three

515 consecutive aggression tests over three days. In a second group of mice (N = 3) the testing  
516 order as reversed. Recordings were done with 15-25% LED intensity using 50 ms or 100 ms  
517 exposure times. Calcium imaging data was successfully collected from 15/24 animals that  
518 underwent surgery. Animals with mistargeted endoscope placements, very few (<15)  
519 recorded neurons, recordings exhibiting excessive movement artifacts, or who showed  
520 insufficient instances of relevant behaviors were excluded from the analysis (7/15).

### 521 *Calcium imaging analysis*

522 Image processing was done using Fiji software. Briefly, videos were first loaded as a stack  
523 of images in .tiff format. The stack was duplicated and for each frame a background frame  
524 was generated using a band pass filter (lower band: 100, higher band: 10,000). Next, each  
525 frame of the recording was divided by the corresponding background frame and the resulting  
526 background-filtered stack was aligned using TurboReg via the translation batch algorithm.  
527 Neuronal ROIs were manually selected from the maximum intensity projection image, with  
528 detection aided by inspecting recordings at increased speed to discern dim neurons with  
529 slow dynamics. Finally, the mean intensity ROI traces were extracted and  $\Delta F/F$  was  
530 calculated where F is the mean intensity over the entire recording period. To track ROIs  
531 over different recordings and days, an ROI mask was projected onto each new recording and  
532 translated if necessary to account for possible field of view movement between recordings.  
533 ROIs that could not be assigned to the mask were treated as new ROIs.

### 534 *Data analysis*

535 For the analysis of neuronal response properties, receiver operating characteristic (ROC)  
536 curves were calculated using custom Python scripts (scikit-learn). Briefly, all frames in a  
537 selected calcium imaging recording were scored as either positive or negative for a  
538 particular behavior and a ROC curve was generated for each neuron by plotting the true  
539 positive and false positive rates across the distribution. The area under the ROC curve  
540 (auROC) was calculated for each recording and averaged across days to give a measure of  
541 the responsiveness of a neuron to a given behavior. Neurons with auROC values greater than  
542 0.65 or less than 0.35 were considered to respond to the behavior (e.g. Assessment+, Defeat-  
543 ). Significance of neuronal response auROC values was estimated by calculating the mean  
544 and standard deviation (SD) of the distribution of auROC values obtained by shuffling true  
545 and false positive labels 1000 times. Neuronal response auROC values  $\geq 3$  SD away from  
546 the mean we considered significant. For the analysis of auROC values for flight behavior 2

547 seconds before and after the initiation of each flight were labeled as true negative and true  
548 positive, respectively. Only recordings with at least 2 instances of relevant behavior were  
549 selected for auROC analysis. Heat maps were generated by extracting calcium imaging data  
550 (meaned z-score over all trials) for individual neurons from before and after the onset or  
551 offset of a given behavior. Significant change across behavioral onset or offset was  
552 estimated for each neuron by performing a Wilcoxon signed rank-sum test (Python, scikit-  
553 learn) on the distribution of values that resulted from averaging the z-scores of frames from  
554 the before and after periods for each trial. For linear discriminant analysis (LDA algorithm,  
555 Python, scikit-learn) data was normalized within days by calculating z-scores for each  
556 recording separately. Each frame was then expressed as a vector containing calcium values  
557 for all neurons. The distance between clusters was quantified by calculating the average  
558 distance between data points of a given cluster and all other data points from other clusters.  
559 For Venn diagrams we included only neurons responding to a behaviors (e.g. Defeat+) that  
560 were recorded across all relevant behaviors, resulting in different numbers of neurons across  
561 Venn analyses (**Table S1**). Probability of chance overlap was computed by multiplying the  
562 probabilities of responsive neurons. Significance was assessed using Fisher's test.

### 563 *Statistical analysis*

564 Prism Graphpad 5 software or custom scripts in Python were used to generate graphs and  
565 perform statistical analysis. For calcium imaging Wilcoxon rank-sum test (Python, scikit-  
566 learn package) was performed. For cFos experiments one-way ANOVA with Tukey's post-  
567 hoc test was used. For optogenetic experiments repeated measures ANOVA with Tukey's  
568 post-hoc test was used. For assessing significance of overlap between different populations  
569 of neurons Fisher's test was used. For assessing significance differences in LDA  
570 representations the one-way ANOVA and T test were used.

### 571 *Data and code availability*

572 Custom code written for this study as well as behavioral and imaging data will be made  
573 available upon reasonable request.

### 574 **Author contributions**

575 All behavioral experiments and data analysis were carried out by P.K. B.P. and P.K. carried  
576 out the analysis of neuron ensembles. C.T.G. supervised the work and together with P.K.  
577 conceived the project, designed the experiments, and wrote the manuscript.



## 578 Acknowledgements

579 We thank Dominic Evans and Tiago Branco for sharing expertise in calcium endoscopy and  
580 Daniel Rossier, Irene Ayuso, Senthil Deivasigamani, Hiroki Asari and Santiago Rompani  
581 for helpful comments on the manuscript. The work was supported by EMBL and the  
582 European Research Council (ERC) Advanced Grant COREFEAR to C.T.G.

## 583 References

- 584 Blanchard, D. C., Griebel, G., Pobbe, R., & Blanchard, R. J. (2011). Risk assessment as an  
585 evolved threat detection and analysis process. *Neuroscience and Biobehavioral Reviews*,  
586 35(4), 991–998. <https://doi.org/10.1016/j.neubiorev.2010.10.016>
- 587 Canteras, N. S. (2002). The medial hypothalamic defensive system: Hodological organization  
588 and functional implications. *Pharmacology Biochemistry and Behavior*.  
589 [https://doi.org/10.1016/S0091-3057\(01\)00685-2](https://doi.org/10.1016/S0091-3057(01)00685-2)
- 590 Canteras, N. S., Simerly, R. B., & Swanson, L. W. (1994). Organization of projections from  
591 the ventromedial nucleus of the hypothalamus: A Phaseolus vulgaris-Leucoagglutinin  
592 study in the rat. *Journal of Comparative Neurology*.  
593 <https://doi.org/10.1002/cne.903480103>
- 594 Canteras, N. S., Simerly, R. B., & Swanson, L. W. (1995). Organization of projections from  
595 the medial nucleus of the amygdala: A PHAL study in the rat. *Journal of Comparative*  
596 *Neurology*. <https://doi.org/10.1002/cne.903600203>
- 597 Falkner, A. L., Dollar, P., Perona, P., Anderson, D. J., & Lin, D. (2014). Decoding  
598 ventromedial hypothalamic neural activity during male mouse aggression. *The Journal of*  
599 *Neuroscience : The Official Journal of the Society for Neuroscience*, 34(17), 5971–5984.  
600 <https://doi.org/10.1523/JNEUROSCI.5109-13.2014>
- 601 Falkner, A. L., Grosenick, L., Davidson, T. J., Deisseroth, K., & Lin, D. (2016).  
602 Hypothalamic control of male aggression-seeking behavior. *Nature Neuroscience*, 19(4),  
603 596–604. <https://doi.org/10.1038/nn.4264>
- 604 Garfield, A. S., Shah, B. P., Madara, J. C., Burke, L. K., Patterson, C. M., Flak, J., ... Heisler,  
605 L. K. (2014). A parabrachial-hypothalamic cholecystokinin neurocircuit controls  
606 counterregulatory responses to hypoglycemia. *Cell Metabolism*, 20(6), 1030–1037.  
607 <https://doi.org/10.1016/j.cmet.2014.11.006>
- 608 Guenther, C. J., Miyamichi, K., Yang, H. H., Heller, H. C., & Luo, L. (2013). Permanent  
609 genetic access to transiently active neurons via TRAP: targeted recombination in active  
610 populations. *Neuron*, 78(5), 773–784. <https://doi.org/10.1016/j.neuron.2013.03.025>
- 611 Hashikawa, K., Hashikawa, Y., Tremblay, R., Zhang, J., Feng, J. E., Sabol, A., ... Lin, D.  
612 (2017). Esr1(+) cells in the ventromedial hypothalamus control female aggression.  
613 *Nature Neuroscience*, 20(11), 1580–1590. <https://doi.org/10.1038/nn.4644>
- 614 Kruk, M. R., Van Der Poel, A. M., Meelis, W., Hermans, J., Mostert, P. G., Mos, J., &  
615 Lohman, A. H. M. (1983). Discriminant analysis of the localization of aggression-

- 616 inducing electrode placements in the hypothalamus of male rats. *Brain Research*.  
617 [https://doi.org/10.1016/0006-8993\(83\)90764-3](https://doi.org/10.1016/0006-8993(83)90764-3)
- 618 Kunwar, P. S., Zelikowsky, M., Remedios, R., Cai, H., Yilmaz, M., Meister, M., & Anderson,  
619 D. J. (2015). Ventromedial hypothalamic neurons control a defensive emotion state.  
620 *ELife*, 4, e06633. <https://doi.org/10.7554/eLife.06633>
- 621 Lee, H., Kim, D. W., Remedios, R., Anthony, T. E., Chang, A., Madisen, L., ... Anderson, D.  
622 J. (2014). Scalable control of mounting and attack by *Esr1*+neurons in the ventromedial  
623 hypothalamus. *Nature*. <https://doi.org/10.1038/nature13169>
- 624 Leroy, F., Park, J., Asok, A., Brann, D. H., Meira, T., Boyle, L. M., ... Siegelbaum, S. A.  
625 (2018). A circuit from hippocampal CA2 to lateral septum disinhibits social aggression.  
626 *Nature*, 564(7735), 213–218. <https://doi.org/10.1038/s41586-018-0772-0>
- 627 Li, Y., Mathis, A., Grewe, B. F., Osterhout, J. A., Ahanonu, B., Schnitzer, M. J., ... Dulac, C.  
628 (2017). Neuronal Representation of Social Information in the Medial Amygdala of  
629 Awake Behaving Mice. *Cell*, 171(5), 1176–1190.e17.  
630 <https://doi.org/10.1016/j.cell.2017.10.015>
- 631 Lin, D., Boyle, M. P., Dollar, P., Lee, H., Lein, E. S., Perona, P., & Anderson, D. J. (2011).  
632 Functional identification of an aggression locus in the mouse hypothalamus. *Nature*.  
633 <https://doi.org/10.1038/nature09736>
- 634 Lo, L., Yao, S., Kim, D.-W., Cetin, A., Harris, J., Zeng, H., ... Weissbourd, B. (2019).  
635 Connectional architecture of a mouse hypothalamic circuit node controlling social  
636 behavior. *Proceedings of the National Academy of Sciences of the United States of*  
637 *America*, 116(15), 7503–7512. <https://doi.org/10.1073/pnas.1817503116>
- 638 Lorenz, K. (1963). *On aggression*. On aggression. Harcourt, Brace and World: New York.
- 639 Motta, S. C., Goto, M., Gouveia, F. V., Baldo, M. V. C., Canteras, N. S., & Swanson, L. W.  
640 (2009). Dissecting the brain's fear system reveals the hypothalamus is critical for  
641 responding in subordinate conspecific intruders. *Proceedings of the National Academy of*  
642 *Sciences*. <https://doi.org/10.1073/pnas.0900939106>
- 643 Olivier, B. (1977). The ventromedial hypothalamus and aggressive behaviour in rats.  
644 *Aggressive Behavior*, 3(1), 47–56. [https://doi.org/10.1002/1098-2337\(1977\)3:1<47::AID-AB2480030105>3.0.CO;2-H](https://doi.org/10.1002/1098-2337(1977)3:1<47::AID-AB2480030105>3.0.CO;2-H)
- 646 Pedregosa, F., Varoquaux, G., Gramfort, A., Michel, V., Thirion, B., Grisel, O., ...  
647 Duchesnay, É. (2012). Scikit-learn: Machine Learning in Python, 2825–2830.  
648 <https://doi.org/10.1007/s13398-014-0173-7.2>
- 649 Remedios, R., Kennedy, A., Zelikowsky, M., Grewe, B. F., Schnitzer, M. J., & Anderson, D.  
650 J. (2017). Social behaviour shapes hypothalamic neural ensemble representations of  
651 conspecific sex. *Nature*, 550(7676), 388–392. <https://doi.org/10.1038/nature23885>
- 652 Risold, P. Y., & Swanson, L. W. (1997). Chemoarchitecture of the rat lateral septal nucleus.  
653 *Brain Research Reviews*. [https://doi.org/10.1016/S0165-0173\(97\)00008-8](https://doi.org/10.1016/S0165-0173(97)00008-8)
- 654 Sakurai, K., Zhao, S., Takatoh, J., Rodriguez, E., Lu, J., Leavitt, A. D., ... Wang, F. (2016).  
655 Capturing and Manipulating Activated Neuronal Ensembles with CANE Delineates a  
656 Hypothalamic Social-Fear Circuit. *Neuron*, 92(4), 739–753.

- 657 <https://doi.org/10.1016/j.neuron.2016.10.015>
- 658 Silva, B. A., Gross, C. T., & Graff, J. (2016). The neural circuits of innate fear: detection,  
659 integration, action, and memorization. *Learning & Memory (Cold Spring Harbor, N.Y.)*,  
660 23(10), 544–555. <https://doi.org/10.1101/lm.042812.116>
- 661 Silva, B. A., Mattucci, C., Krzywkowski, P., Cuzzo, R., Carbonari, L., & Gross, C. T.  
662 (2016). The ventromedial hypothalamus mediates predator fear memory. *The European*  
663 *Journal of Neuroscience*, 43(11), 1431–1439. <https://doi.org/10.1111/ejn.13239>
- 664 Silva, B. A., Mattucci, C., Krzywkowski, P., Murana, E., Illarionova, A., Grinevich, V., ...  
665 Gross, C. T. (2013). Independent hypothalamic circuits for social and predator fear. *Nat*  
666 *Neurosci*, 16(12), 1731–1733. Retrieved from <http://dx.doi.org/10.1038/nn.3573>
- 667 Strange, B. A., Witter, M. P., Lein, E. S., & Moser, E. I. (2014). Functional organization of  
668 the hippocampal longitudinal axis. *Nature Reviews. Neuroscience*, 15(10), 655–669.  
669 <https://doi.org/10.1038/nrn3785>
- 670 Swanson, L. W. (2000). Cerebral hemisphere regulation of motivated behavior. *Brain*  
671 *Research*. [https://doi.org/10.1016/S0006-8993\(00\)02905-X](https://doi.org/10.1016/S0006-8993(00)02905-X)
- 672 Swanson, L. W., & Petrovich, G. D. (1998). What is the amygdala? *Trends Neuroscience*.  
673 [https://doi.org/10.1016/S0166-2236\(98\)01265-X](https://doi.org/10.1016/S0166-2236(98)01265-X)
- 674 Tosches, M. A., & Arendt, D. (2013). The bilaterian forebrain: an evolutionary chimaera.  
675 *Current Opinion in Neurobiology*, 23(6), 1080–1089.  
676 <https://doi.org/10.1016/j.conb.2013.09.005>
- 677 Viskaitis, P., Irvine, E. E., Smith, M. A., Choudhury, A. I., Alvarez-Curto, E., Glegola, J. A.,  
678 ... Withers, D. J. (2017). Modulation of SF1 Neuron Activity Coordinately Regulates  
679 Both Feeding Behavior and Associated Emotional States. *Cell Reports*, 21(12), 3559–  
680 3572. <https://doi.org/10.1016/j.celrep.2017.11.089>
- 681 Wang, L., Talwar, V., Osakada, T., Kuang, A., Guo, Z., Yamaguchi, T., & Lin, D. (2019).  
682 Hypothalamic Control of Conspecific Self-Defense. *Cell Reports*, 26(7), 1747–1758.e5.  
683 <https://doi.org/10.1016/j.celrep.2019.01.078>
- 684 Wong, L. C., Wang, L., D'Amour, J. A., Yumita, T., Chen, G., Yamaguchi, T., ... Lin, D.  
685 (2016). Effective Modulation of Male Aggression through Lateral Septum to Medial  
686 Hypothalamus Projection. *Current Biology : CB*, 26(5), 593–604.  
687 <https://doi.org/10.1016/j.cub.2015.12.065>
- 688 Yang, C. F., Chiang, M. C., Gray, D. C., Prabhakaran, M., Alvarado, M., Juntti, S. A., ...  
689 Shah, N. M. (2013). Sexually dimorphic neurons in the ventromedial hypothalamus  
690 govern mating in both sexes and aggression in males. *Cell*.  
691 <https://doi.org/10.1016/j.cell.2013.04.017>
- 692 Yang, T., Yang, C. F., Chizari, M. D., Maheswaranathan, N., Burke, K. J. J., Borius, M., ...  
693 Shah, N. M. (2017). Social Control of Hypothalamus-Mediated Male Aggression.  
694 *Neuron*, 95(4), 955–970.e4. <https://doi.org/10.1016/j.neuron.2017.06.046>
- 695
